# Supplementary material for: Porous palladium copper nanoparticles for the electrocatalytic oxidation of methanol in direct methanol fuel cells
Source: Royal Society of Chemistry journal article supplement (doi:10.1039/c3ta01664a), 2013-01-01
Supplement: c3ta01664a.pdf [file c3ta01664a.pdf]

# *Supporting Information*

## Porous Palladium Copper Nanoparticles for Electrocatalytic Oxidation of Methanol in Direct Methanol Fuel Cells

*Zih-Yu Shih<sup>a</sup>, Chia-Wei Wang<sup>a</sup>, Guobao Xu<sup>b</sup>, and Huan-Tsung Chang<sup>\*a</sup>*

*<sup>a</sup>Department of Chemistry, National Taiwan University, 1, Section 4, Roosevelt Road, Taipei 106,  
Taiwan*

*<sup>b</sup>State Key Laboratory of Electroanalytical Chemistry, Changchun Institute of Applied Chemistry,  
Chinese Academy of Sciences, Changchun 130022, China*

Correspondence: Professor Huan-Tsung Chang, Department of Chemistry, National Taiwan University,  
1, Section 4, Roosevelt Road, Taipei 106, Taiwan.

Tel. and fax: 011-886-2-33661171

E-mail: [changht@ntu.edu.tw](mailto:changht@ntu.edu.tw)

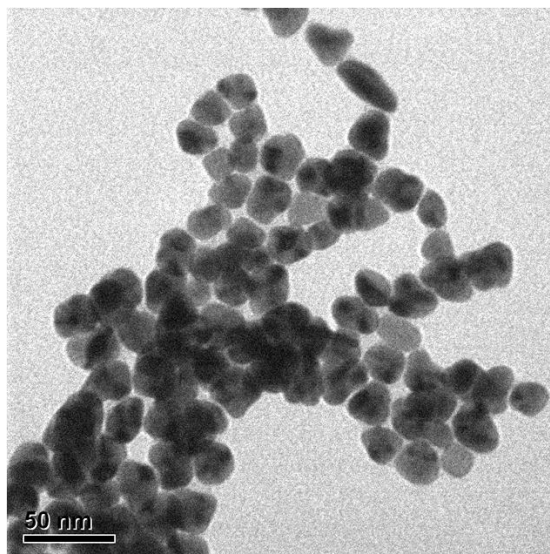

**Figure S1.** TEM image of the PdCu NPs prepared at Pd<sup>2+</sup>/Cu<sup>2+</sup> molar ratio of 10/1 for 30 min bubbling with nitrogen gas.

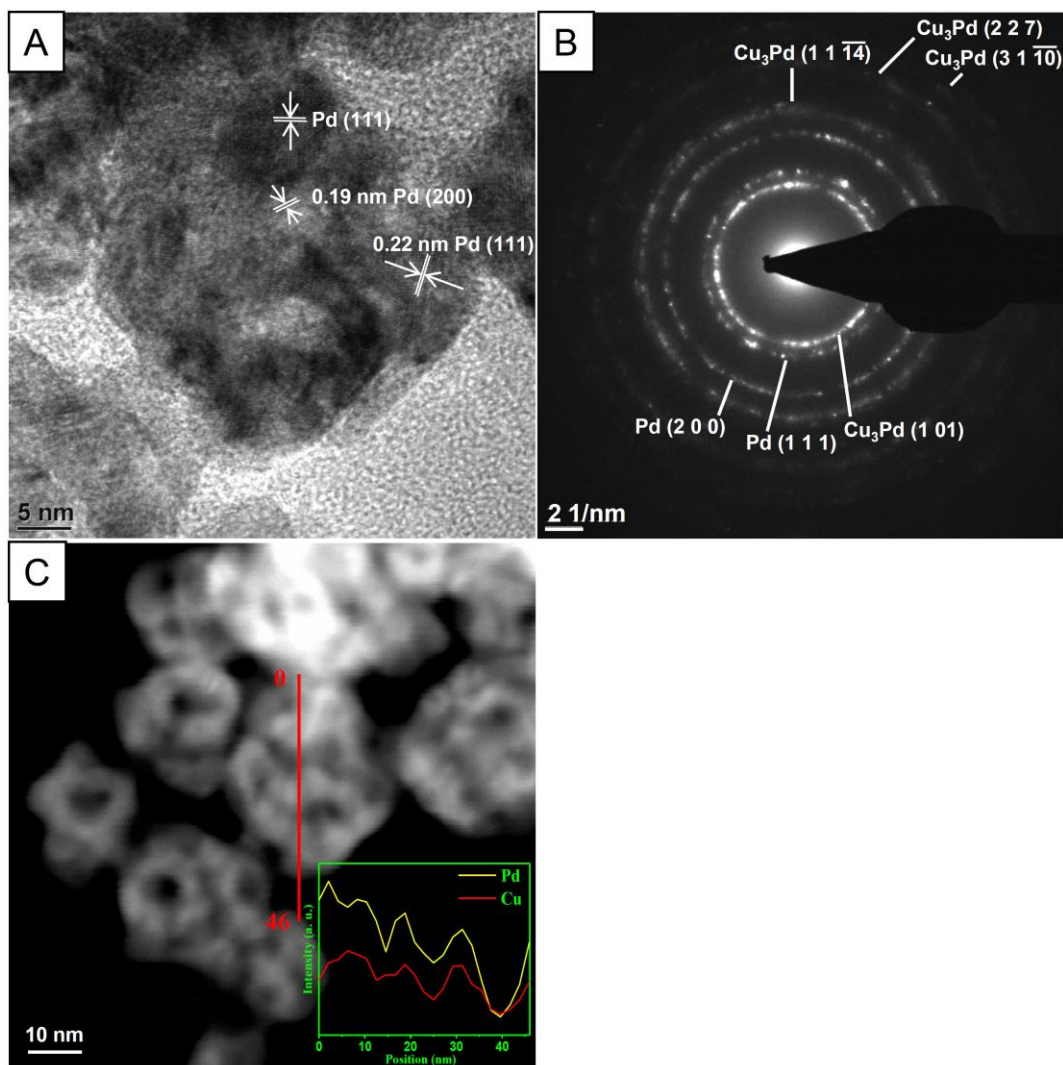

**Figure S2.** (A) HRTEM, (B) electron diffraction, and (C) dark-field HAADF-STEM images of the porous PdCu NPs prepared at Pd<sup>2+</sup>/Cu<sup>2+</sup> molar ratio of 1/10 for 30 min. Inset to (C): corresponding EDS line scan of Pd and Cu elements.

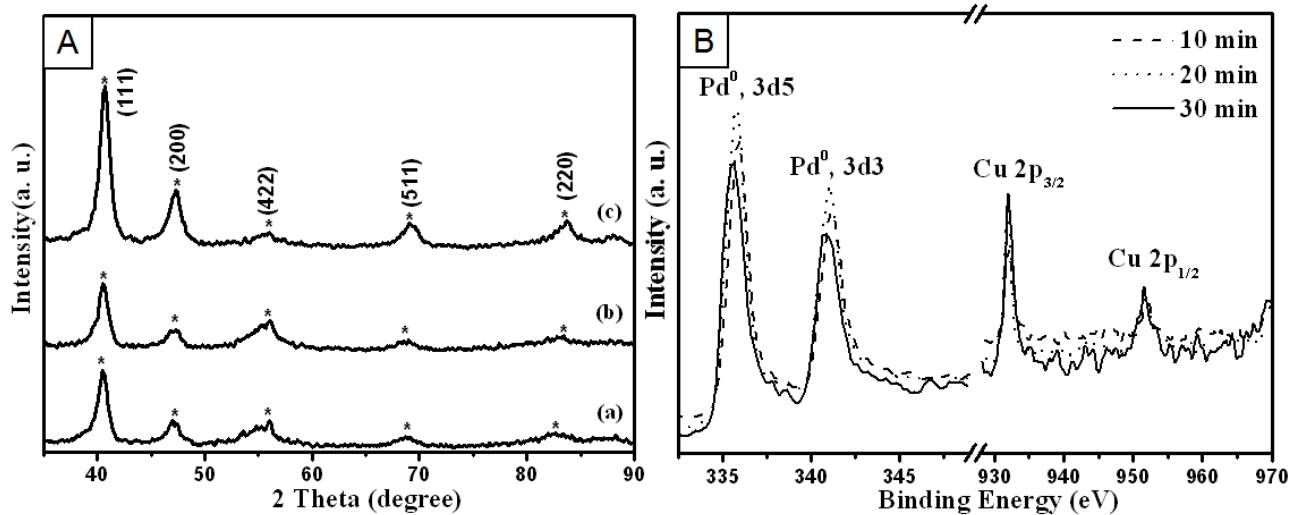

**Figure S3.** (A) Powder XRD patterns and (B) XPS spectra displaying the Pd 3d and Cu 2p energy levels of porous PdCu NPs prepared at Pd<sup>2+</sup>/Cu<sup>2+</sup> molar ratio of 1/10 for (a and dashed line) 10, (b and dotted line) 20, and (c and solid line) 30 min.

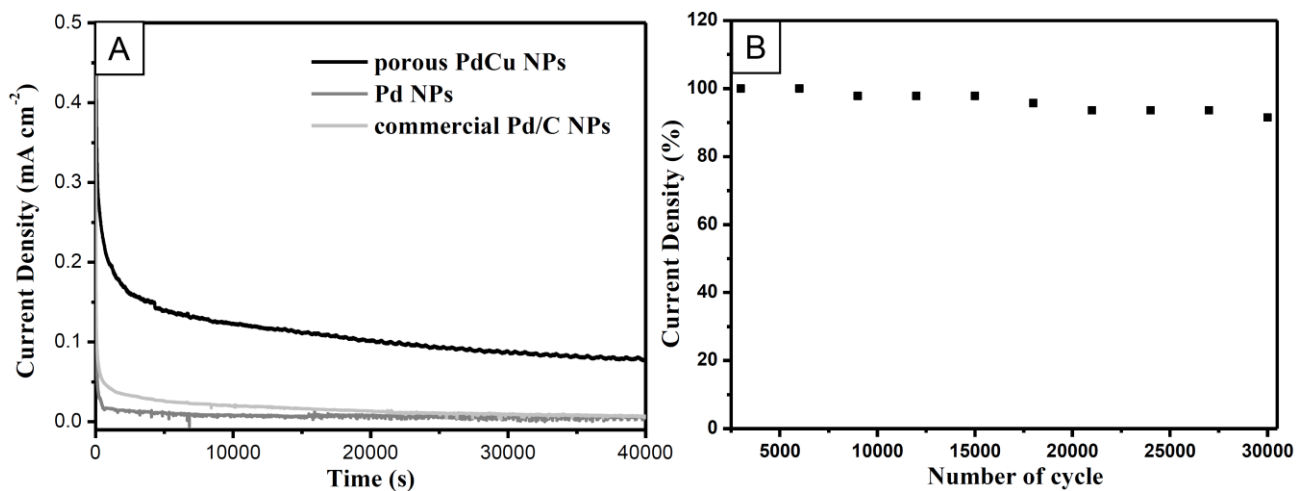

**Figure S4.** (A) Chronoamperometric curves of modified electrodes that were fabricated from porous PdCu NPs prepared at Pd<sup>2+</sup>/Cu<sup>2+</sup> molar ratio of 1/10, Pd NPs, and commercial Pd/C NPs (B) ADT for porous PdCu NPs at a scan rate of 50 mV s<sup>-1</sup>. Measurements: fixed potential at -0.2 V vs. Ag/AgCl in 0.5 M KOH containing 0.5 M methanol.
